# Supplementary material for: Glycyrrhizic acid Poly(D,L-lactide-co-glycolide) nanoparticles: anti-aging cosmeceutical formulation for topical applications
Source: PeerJ journal article supplement (doi:10.7717/peerj.14139), 2022-10-12
Supplement: RAW_DATA1--Calibration_curve_and_Release_amount.xlsx [file RAW_DATA1--Calibration_curve_and_Release_amount.xlsx]

## Sheet: Calibration curve
		Concentration (µg/mL)	Absorbance 1	Absorbance 2	Absorbance 3	Mean
		0	0	0	0	0
		20	0.275	0.276	0.272	0.274333
		30	0.436	0.442	0.435	0.437667
		50	0.726	0.726	0.728	0.726667
		55	0.837	0.842	0.84	0.839667
		60	0.938	0.936	0.943	0.939
	Concentration (µg/mL)	Mean
	0	0
	20	0.274333
	30	0.437667
	50	0.726667
	55	0.839667
	60	0.939

## Sheet: % Relase amount 
	Time (h)	abs 1	abs 2	abs 3	y=0.015x	y=0.015x	y=0.015x	50*1	50*2	50*3	Mean	%release amount
	1	0.014	0.012	0.012	0.903226	0.774194	0.774194	45.1613	38.7097	38.7097	40.8602	7.68049
	2	0.017	0.015	0.019	1.09677	0.967742	1.22581	54.8387	48.3871	61.2903	54.8387	10.308
	3	0.025	0.022	0.022	1.6129	1.41935	1.41935	80.6452	70.9677	70.9677	74.1935	13.9462
	4	0.028	0.033	0.03	1.80645	2.12903	1.93548	90.3226	106.452	96.7742	97.8495	18.3928
	5	0.038	0.035	0.033	2.45161	2.25806	2.12903	122.581	112.903	106.452	113.978	21.4245
	24	0.109	0.115	0.113	7.03226	7.41935	7.29032	351.613	370.968	364.516	362.366	68.1138
	48	0.161	0.157	0.159	10.3871	10.129	10.2581	519.355	506.452	512.903	512.903	96.4104
				Time (h)	%release amount
				0	0
				1	7.68049
				2	10.308
				3	13.9462
				4	18.3928
				5	21.4245
				24	68.1138
				48	96.4104
