# Supplementary material for: Glycyrrhizic acid Poly(D,L-lactide-co-glycolide) nanoparticles: anti-aging cosmeceutical formulation for topical applications
Source: PeerJ journal article supplement (doi:10.7717/peerj.14139), 2022-10-12
Supplement: RAW_DATA2-Citotoxicity.xlsx [file RAW_DATA2-Citotoxicity.xlsx]

## Sheet: Citotoxicity
	Descriptives
		N	Mean	Std. Deviation	Std. Error	95% Confidence Interval for Mean		Minimum	Maximum
						Lower Bound	Upper Bound
Nanoparticle	Control	3	100	9.1593	5.28812	77.247	122.753	90.157	108.273
	0.0625	3	98.7568	4.0372	2.33088	88.7278	108.786	95.0925	103.085
	0.125	3	83.0809	2.61885	1.51199	76.5754	89.5865	81.0432	86.0348		Nanoparticle	Cell viability (%)	std.
	0.25	3	82.2677	11.342	6.54833	54.0925	110.443	73.825	95.1598		Control	100	9.1593
	0.5	3	80.2673	1.00733	0.581579	77.765	82.7697	79.3606	81.3517		0.0625	98.7568	4.0372
	1	3	72.9015	7.85197	4.53334	53.3961	92.4068	63.8587	77.9921		0.125	83.0809	2.61885
	2	3	76.7714	9.27107	5.35266	53.7407	99.802	66.1021	82.866		0.25	82.2677	11.342
	3	3	68.4707	4.84808	2.79904	56.4274	80.514	64.2793	73.7801		0.5	80.2673	1.00733
	4	3	64.3578	6.05727	3.49717	49.3107	79.4049	57.4033	68.4801		1	72.9015	7.85197
GA	0.005	3	100.776	8.67498	5.0085	79.226	122.326	90.774	106.254		2	76.7714	9.27107
	0.011	3	100.122	7.88667	4.55337	80.53	119.713	93.3427	108.777		3	68.4707	4.84808
	0.022	3	80.6412	6.74818	3.89606	63.8778	97.4046	73.9652	87.4593		4	64.3578	6.05727
	0.044	3	81.7629	7.47675	4.31671	63.1897	100.336	73.1408	86.4554
	0.09	3	80.4917	1.85258	1.06959	75.8896	85.0938	78.6876	82.3892
	0.18	3	82.5294	8.51748	4.91757	61.3708	103.688	73.0398	89.5121
	0.27	3	90.1944	8.69024	5.01731	68.6067	111.782	80.3365	96.7471
	0.35	3	69.4055	6.87227	3.96771	52.3338	86.4772	63.7689	77.0611
	Total	51	83.1057	12.7088	1.77959	79.5313	86.6801	57.4033	108.777
			GA (concentration	Cell viability (%)	std.
			0.005	100.776	8.67498
			0.011	100.122	7.88667
			0.022	80.6412	6.74818
			0.044	81.7629	7.47675
			0.09	80.4917	1.85258
			0.18	82.5294	8.51748
			0.27	90.1944	8.69024
			0.35	69.4055	6.87227
