# Supplementary material for: Glycyrrhizic acid Poly(D,L-lactide-co-glycolide) nanoparticles: anti-aging cosmeceutical formulation for topical applications
Source: PeerJ journal article supplement (doi:10.7717/peerj.14139), 2022-10-12
Supplement: RAW_DATA3-Ames_assay.xlsx [file RAW_DATA3-Ames_assay.xlsx]

## Sheet: Sayfa1
	TA98
	Descriptives									Gentotoxic effects of GA, and GA-PLGA NPs on S. typhimurium TA98 and TA100 mutant strains
	AMES
		N	Mean	Std. Deviation	Std. Error	95% Confidence Interval for Mean		Minimum	Maximum					Number of revertant colony/Plate
						Lower Bound	Upper Bound					Treatment	Concentration	TA98	TA100
	TA100 Negative Control	3	27	2.64575	1.52753	20.4276	33.5724	25	30				(mg/mL)	Mean±SD	Mean±SD
	TA100 Spontaneous Control	3	22.6667	3.05505	1.76383	15.0775	30.2558	20	26				0.219	30.33± 2.51	114.00 ±28.21
	TA100 Positive Control	3	1139.67	43.8216	25.3004	1030.81	1248.53	1110	1190			GA	0.438	27.33± 2.45	97.00±19.67
	TA100 Nanoparticle 0.125	3	30	2	1.1547	25.0317	34.9683	28	32				0.875	27.66± 2.31	105.33±13.31
	TA100 nanoparticle 0.25	3	32.6667	1.52753	0.881917	28.8721	36.4612	31	34				1.75	25.66 ± 2.08	95.66±6.42
	TA100 nanoparticle 0.5	3	26	3	1.73205	18.5476	33.4524	23	29			GA-PLGA-NPs	0.125	30.00± 2.00	104.66±13.31
	TA100 nanoparticle 1	3	32	1	0.57735	29.5159	34.4841	31	33				0.25	32.66 ± 1.52	110.00 ±21.93
	TA100 GA 0.219	3	30.3333	2.51661	1.45297	24.0817	36.5849	28	33				0.5	26.00± 3.00	103.33±20.81
	TA100 GA 0.430	3	27.3333	2.51661	1.45297	21.0817	33.5849	25	30				1	32.00±1.00	125.33±4.50
	TA100 GA 0.875	3	27.6667	2.51661	1.45297	21.4151	33.9183	25	30			Positive Control (NPD)	0.005	897.66± 5.87*
	TA100G1.75	3	25.6667	2.08167	1.20185	20.4955	30.8378	24	28			Positive Control (SA)	0.0005		990.66±9.71*
	Total	33	129.182	324.701	56.5231	14.048	244.316	20	1190			Negative Control		27.00±2.64	100.66±10.06
												Spontaneous Control		22.66± 3.05	102.66±2.51
	TA100											NPD: 4‐Nitro‐o‐phenylenediamine
	Descriptives											SA: Sodium azide
	AMES
		N	Mean	Std. Deviation	Std. Error	95% Confidence Interval for Mean		Minimum	Maximum
						Lower Bound	Upper Bound
	TA98 Negative Control	3	27	2.64575	1.52753	20.4276	33.5724	25	30
	TA98 Spontaneous Control	3	22.6667	3.05505	1.76383	15.0775	30.2558	20	26
	TA98 Positive Control	3	1139.67	43.8216	25.3004	1030.81	1248.53	1110	1190
	TA98 Nanoparticle 0.125	3	30	2	1.1547	25.0317	34.9683	28	32
	TA98 nanoparticle 0.25	3	32.6667	1.52753	0.881917	28.8721	36.4612	31	34
	TA98 nanoparticle 0.5	3	26	3	1.73205	18.5476	33.4524	23	29
	TA98 nanoparticle 1	3	32	1	0.57735	29.5159	34.4841	31	33
	TA98 GA 0.219	3	30.3333	2.51661	1.45297	24.0817	36.5849	28	33
	TA98 GA 0.430	3	27.3333	2.51661	1.45297	21.0817	33.5849	25	30
	TA98 GA 0.875	3	27.6667	2.51661	1.45297	21.4151	33.9183	25	30
	TA98 G1.75	3	25.6667	2.08167	1.20185	20.4955	30.8378	24	28
	Total	33	129.182	324.701	56.5231	14.048	244.316	20	1190
